# Supplementary material
Source: PubMed Central journal article supplement (PMC2707501)
Supplement: NIHMS115647-supplement-2.pdf [file NIHMS115647-supplement-2.pdf]

# Supplementary information

## Wnt signaling arrests effector T cell differentiation and generates CD8<sup>+</sup> memory stem cells

Luca Gattinoni, Xiao-Song Zhong, Douglas C Palmer, Yun Ji, Christian S Hinrichs, Zhiya Yu, Claudia Wrzesinski, Andrea Boni, Lydie Cassard, Lindsay Church, Chrystal M Paulos, Pawel Muranski and Nicholas P Restifo

Address correspondence to Luca Gattinoni or Nicholas P. Restifo, National Cancer Institute, National Institutes of Health, Clinical Research Center, Room 3-5762, 10 Center Drive, Bethesda, MD 20892-1502. E-mail: (LG): [gattinol@mail.nih.gov](mailto:gattinol@mail.nih.gov), (NPR): [restifo@nih.gov](mailto:restifo@nih.gov)

### Supplementary Fig.1

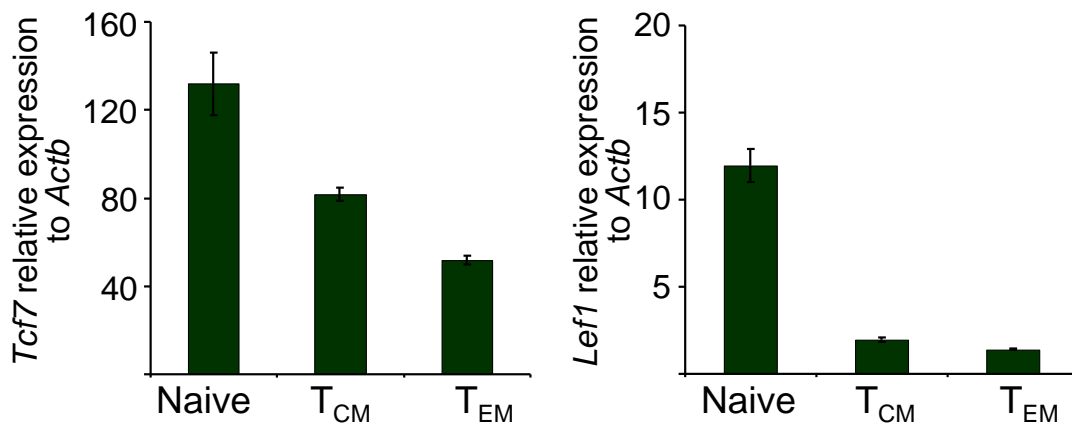

**Supplementary Figure 1. Expression of *Tcf7* and *Lef1* is down-regulated with progressive CD8<sup>+</sup> T-cell differentiation.** Mice receiving 10<sup>6</sup> ly5.1<sup>+</sup> naïve, pmel-1 CD8<sup>+</sup> T cells were vaccinated with a recombinant vaccinia virus encoding hgp100. Three weeks after transfer, mice received a boost immunization with s.c injection of human gp100<sub>25-33</sub> peptide and incomplete Freund's adjuvant. Sixty days after transfer, ly5.1<sup>+</sup> T<sub>CM</sub> (CD44<sup>high</sup>, CD62L<sup>high</sup>) and T<sub>EM</sub> (CD44<sup>high</sup>, CD62L<sup>low</sup>) cells were sorted. T<sub>N</sub> (CD44<sup>low</sup>, CD62L<sup>high</sup>) were sorted from pmel-1 mice splenocytes. Expression of *Tcf7* and *Lef1* was determined by RT-PCR. Data are represented as mean +/- SEM

# Supplementary Fig.2

a

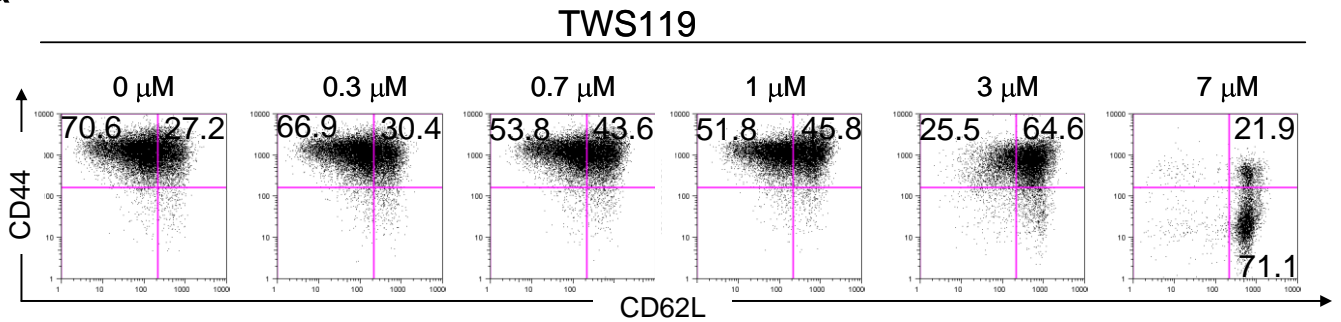

b

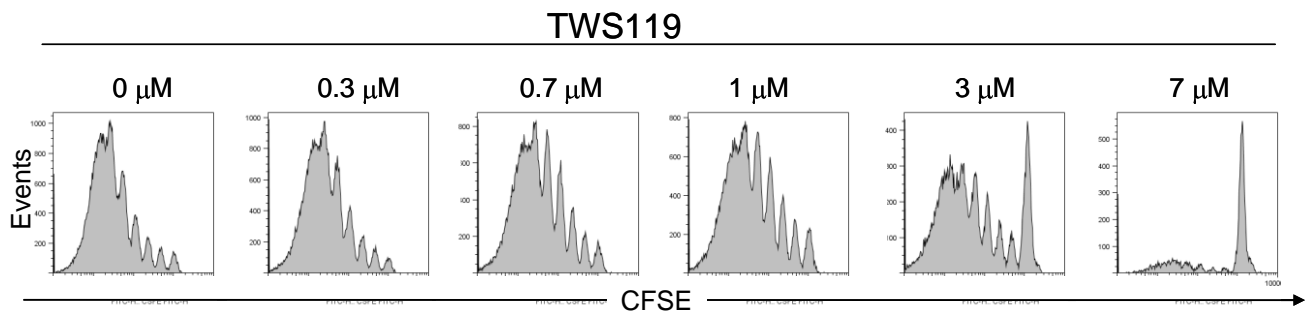

**Supplementary Figure 2. Direct inhibition of CD8<sup>+</sup> T cell proliferation and effector differentiation by activation of Wnt signaling.** a,b, CFSE-labeled, naive CD8<sup>+</sup> T cells were primed *in vitro* with anti-CD3 (2 μg ml<sup>-1</sup>) and anti-CD28 (1 μg ml<sup>-1</sup>) specific antibodies in conjunction with 10 ng ml<sup>-1</sup> IL-2 and titrated doses of TWS119. Four days following T cell activation, T cell phenotype (a) and CFSE dilution (b) were evaluated

# Supplementary Fig.3

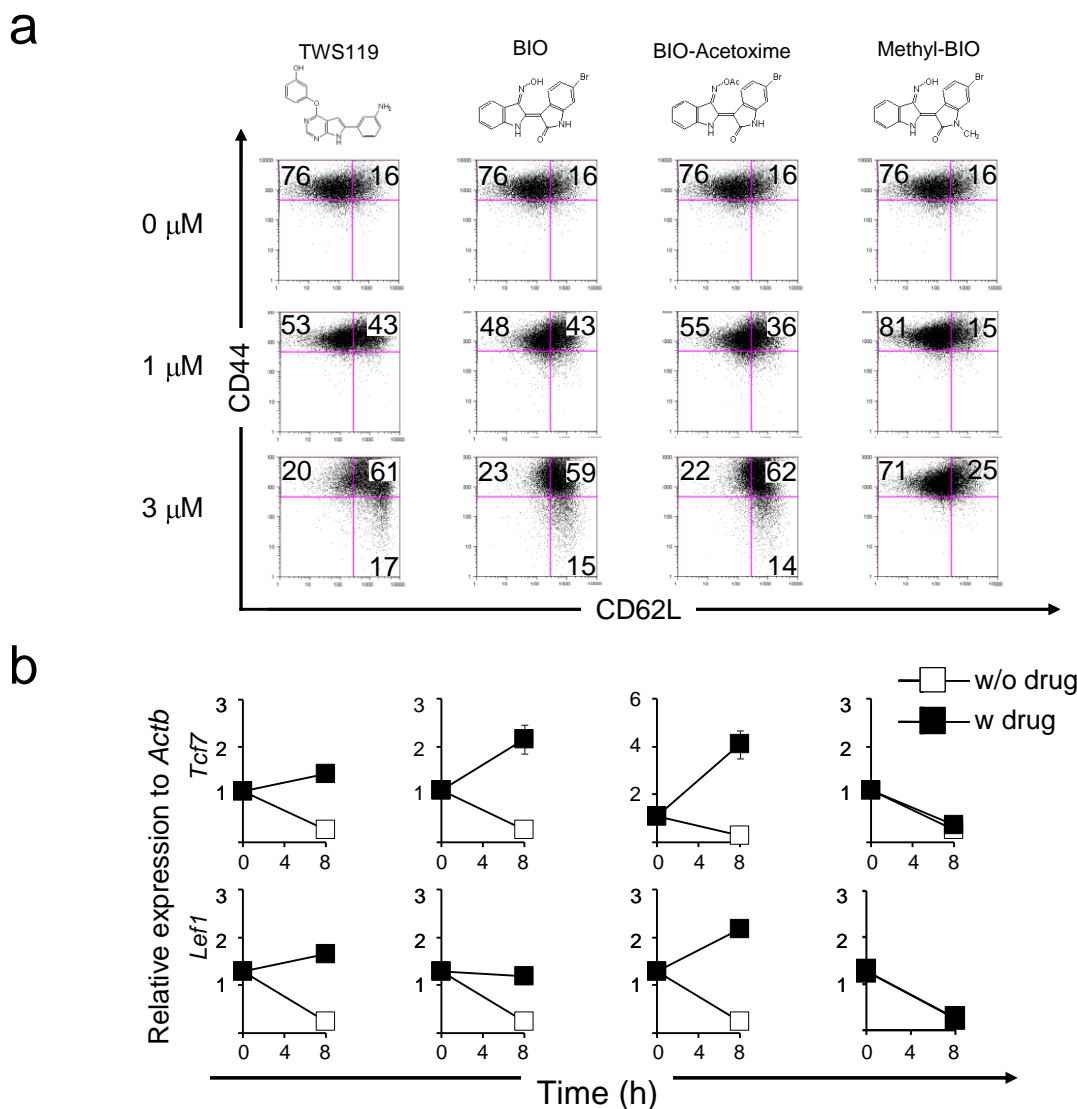

**Supplementary Figure 3. BIO and BIO-acetoxime induce Wnt signaling and inhibit CD8<sup>+</sup> T cell effector differentiation.** **a**, BIO and BIO-acetoxime inhibit the acquisition of the phenotypic traits of effector T cells. Pmel-1 splenocytes were primed *in vitro* with 1 μM hgp100<sub>25-33</sub>, in conjunction with 10 ng ml<sup>-1</sup> IL-2 and titrated doses of TWS119, BIO and BIO-acetoxime. Methyl-BIO, a N-methylated analog of BIO was used as a relevant kinase inactive control. Four days following T cell activation, phenotypic analyses were performed. **b**, BIO and BIO-acetoxime promote the expression of *Tcf7* and *Lef1*. Naive CD8<sup>+</sup> T cells were primed *in vitro* with anti-CD3 and anti-CD28 specific antibodies with or without 3 μM of indicated compounds. Expression of *Tcf7* and *Lef1* was determined by RT-PCR. Data are represented as mean ± SEM

# Supplementary Fig.4

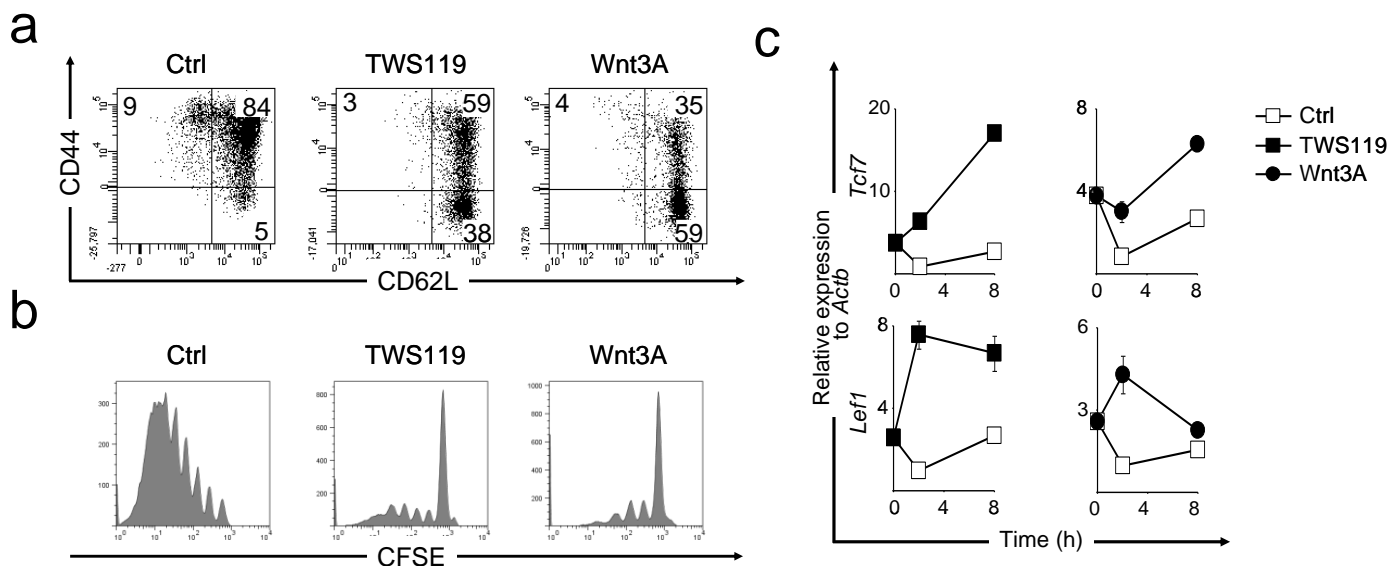

**Supplementary Figure 4. Wnt3A inhibits CD8<sup>+</sup> T cell proliferation and effector differentiation.** Pmel-1 naive CD8<sup>+</sup> T cells were primed *in vitro* with anti-CD3 (2  $\mu\text{g ml}^{-1}$ ) and anti-CD28 (1  $\mu\text{g ml}^{-1}$ ) specific antibodies in conjunction with 10  $\text{ng ml}^{-1}$  IL-2 with or without 1  $\mu\text{g ml}^{-1}$  of Wnt3A or 3  $\mu\text{M}$  TWS119. Four days following T cell activation, phenotypic (a) and CFSE dilution assays (b) were performed. c, Wnt3A promotes the expression of *Tcf7* and *Lef1*. Naive CD8<sup>+</sup> T cells were primed *in vitro* with anti-CD3 (2  $\mu\text{g ml}^{-1}$ ) and anti-CD28 (1  $\mu\text{g ml}^{-1}$ ) specific antibodies with or without 3  $\mu\text{g ml}^{-1}$  of Wnt3A or 3  $\mu\text{M}$  TWS119. Expression of *Tcf7* and *Lef1* was determined by RT-PCR. Data are represented as mean  $\pm$  SEM.

# Supplementary Fig.5

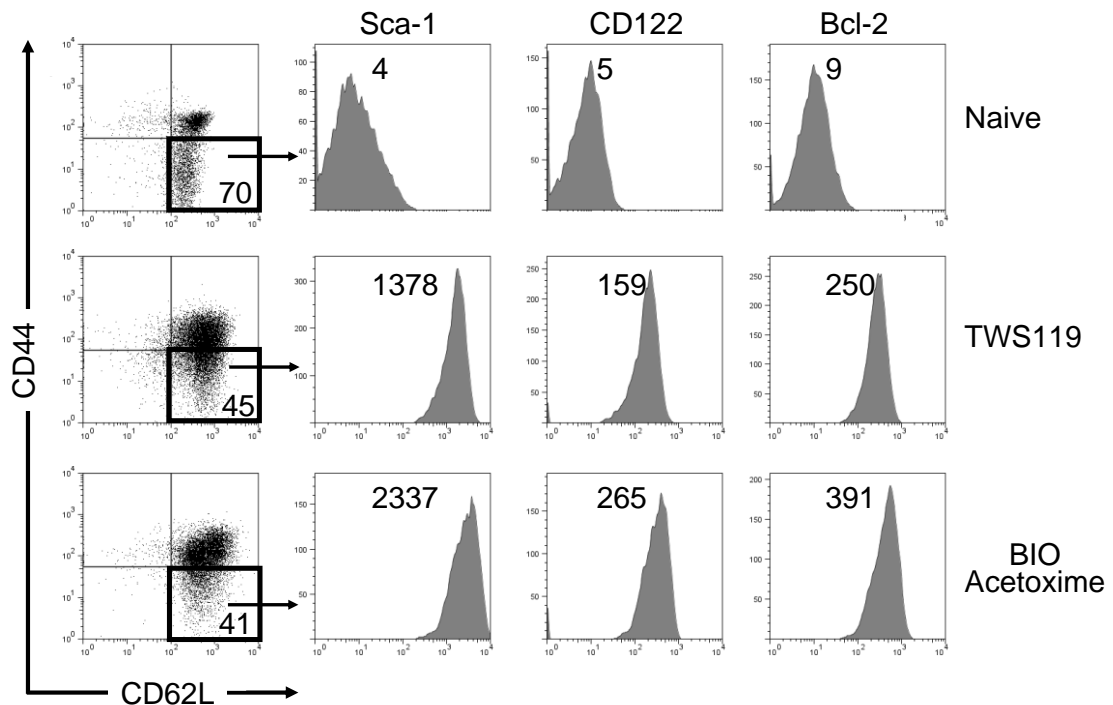

**Supplementary Figure 5. BIO-acetoxime promotes the generation of T<sub>SCM</sub>.** Pmel-1 naive CD8<sup>+</sup> T cells were primed *in vitro* with 1  $\mu$ M hgp100<sub>25-33</sub>, in conjunction with 10 ng ml<sup>-1</sup> IL-2 and 3  $\mu$ M TWS119, or BIO-acetoxime. Four days following T cell activation, TWS119-treated, BIO-acetoxime-treated and naive pmel-1 cells were evaluated by flow cytometry for the expression of CD62L, CD44, Sca-1, CD122 and Bcl-2 in CD8<sup>+</sup> lymphocytes

# Supplementary Fig.6

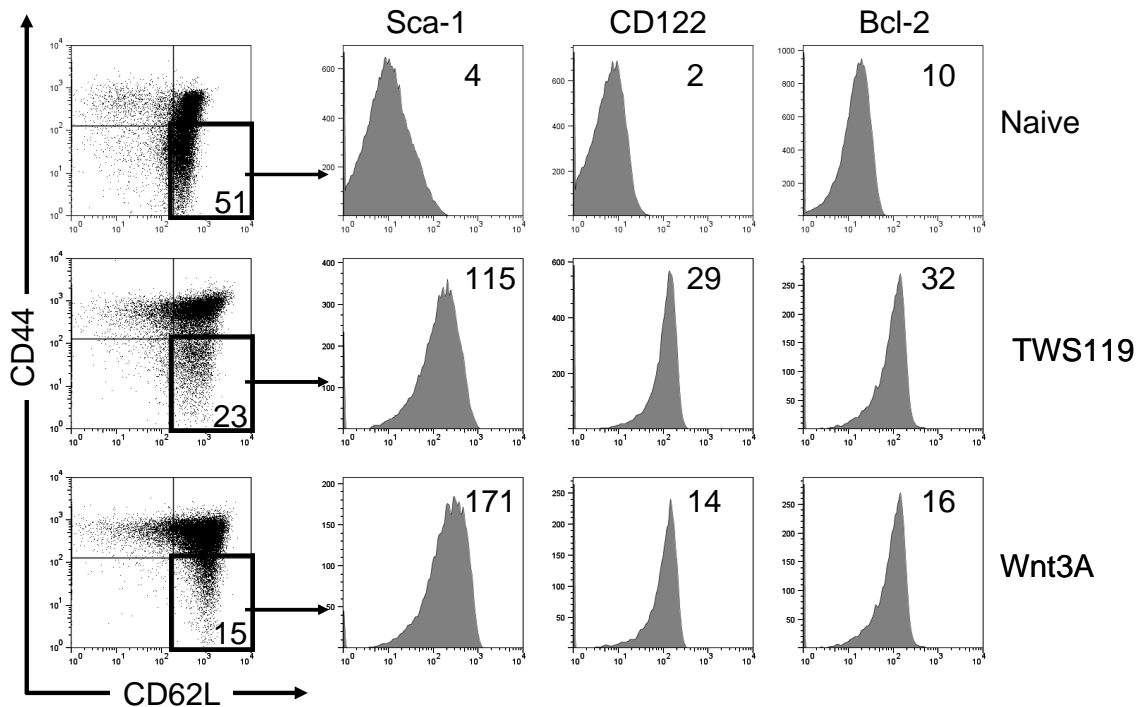

**Supplementary Figure 6. Wnt3A promotes the generation of T<sub>SCM</sub>.** Pmel-1 naive CD8<sup>+</sup> T cells were primed *in vitro* with anti-CD3 (50 ng ml<sup>-1</sup>) and anti-CD28 (1 μg ml<sup>-1</sup>) specific antibodies in conjunction with 10 ng ml<sup>-1</sup> IL-2 and 1 μg ml<sup>-1</sup> of Wnt3A or 1 μM TWS119. Five days following T cell activation, Wnt3A-treated, TWS119-generated and naive pmel-1 cells were evaluated by flow cytometry for the expression of CD62L, CD44, Sca-1, CD122 and Bcl-2 in CD8<sup>+</sup> lymphocytes

# Supplementary Fig.7

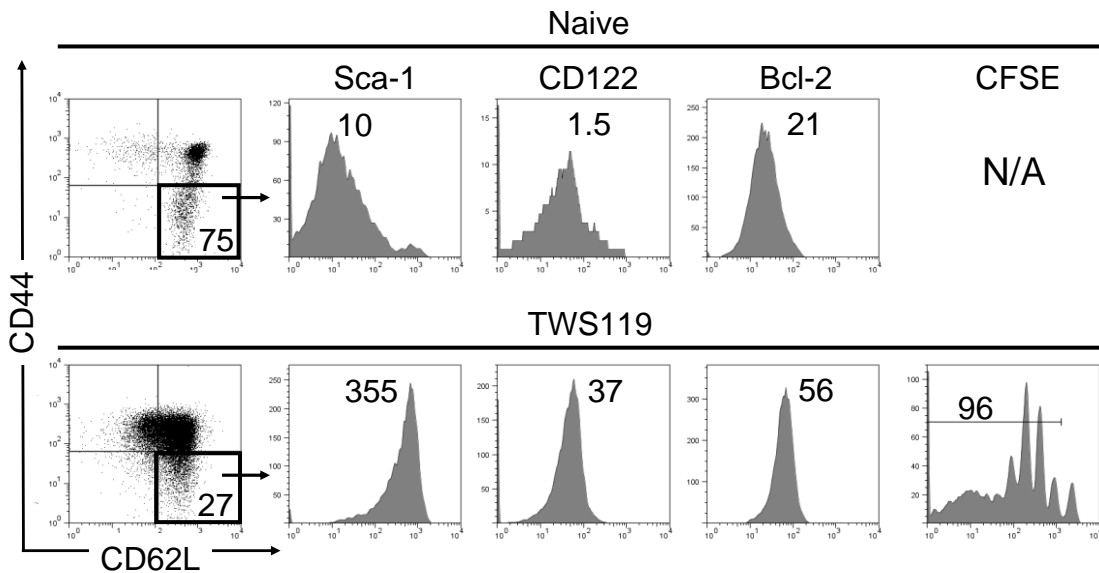

## Supplementary Figure 7. Wnt signaling promotes the generation of $T_{SCM}$ *in vivo*.

C57BL/6 mice received adoptive transfer of  $1.5 \times 10^6$  CFSE-labeled naive pmel-1 thy1.1<sup>+</sup> CD8<sup>+</sup> T cells in conjunction with recombinant fowlpox-based hgp100 vaccine. Mice received four daily doses of TWS119 (at 30 mg kg<sup>-1</sup>) from day 0 to day 3. Six days after treatment, treated mice and unmanipulated pmel-1 mice were sacrificed. Splenocytes from two pooled mice were analyzed by flow cytometry

# Supplementary Fig.8

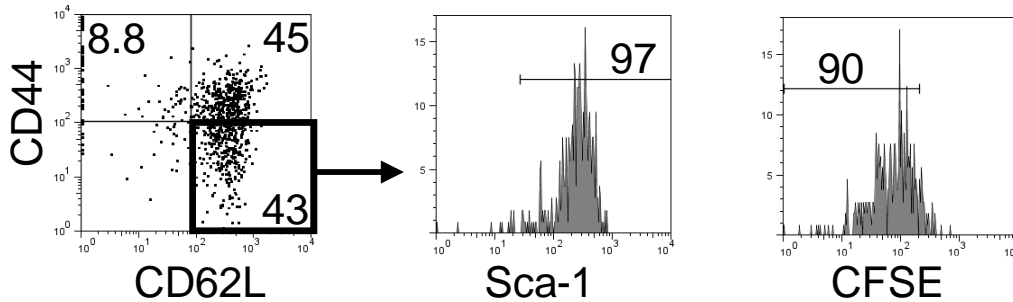

**Supplementary Figure 8. TWS119-generated T<sub>SCM</sub> are multipotent and capable of long-term self-renewal.** Four weeks after primary transfer CD44<sup>low</sup> CD62L<sup>high</sup>, Sca-1<sup>high</sup> thy1.1<sup>+</sup> pmel-1 CD8<sup>+</sup> T cells were re-isolated and re-labeled with CFSE prior to secondary transfer into sublethally-irradiated C57BL/6 mice. Four weeks later, pooled cells from spleen and lymph nodes were analyzed by flow cytometry for the expression of CD62L, CD44, Sca-1 and CFSE in ly5.1<sup>+</sup>, CD8<sup>+</sup> lymphocytes
